# Supplementary material for: Annulation of β-aryl-α-nitro-α,β-enals and 2,2-dimethyl-1,3-dioxan-5-one: a one-step assembly of nitrocyclitols. Application to a short practical synthesis of (±)-7-deoxy-2-epi-pancratistatin tetraacetate
Source: Royal Society of Chemistry journal article supplement (doi:10.1039/b606277f), 2006-01-01

**Annulation of  $\beta$ -aryl- $\alpha$ -nitro- $\alpha,\beta$ -enals and 2,2-dimethyl-1,3-dioxan-5-one: a one-step assembly of nitrocyclitols. Application to a short practical synthesis of (+/-)-7-deoxy-2-*epi*-pancratistatin tetraacetate**

Juan Carlos Ortiz,<sup>†</sup> Lidia Ozores,<sup>‡</sup> Fernando Cagide, Ricardo Alonso\*

*Departamento de Química Orgánica, Universidade de Santiago, 15782 Santiago de Compostela, Spain*

**Supporting Information**

qoraa@u

---

<sup>†</sup> Currently at Sintenovo, Mexico.

<sup>‡</sup> Currently at the Max Planck Institut für Kohlenforschung,  
Kaiser-Wilhelm-Platz 1, D-45470 Mülheim an der Ruhr,  
Germany

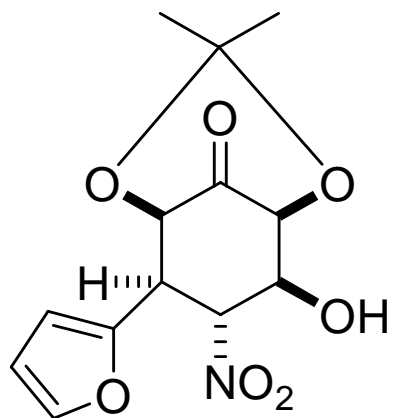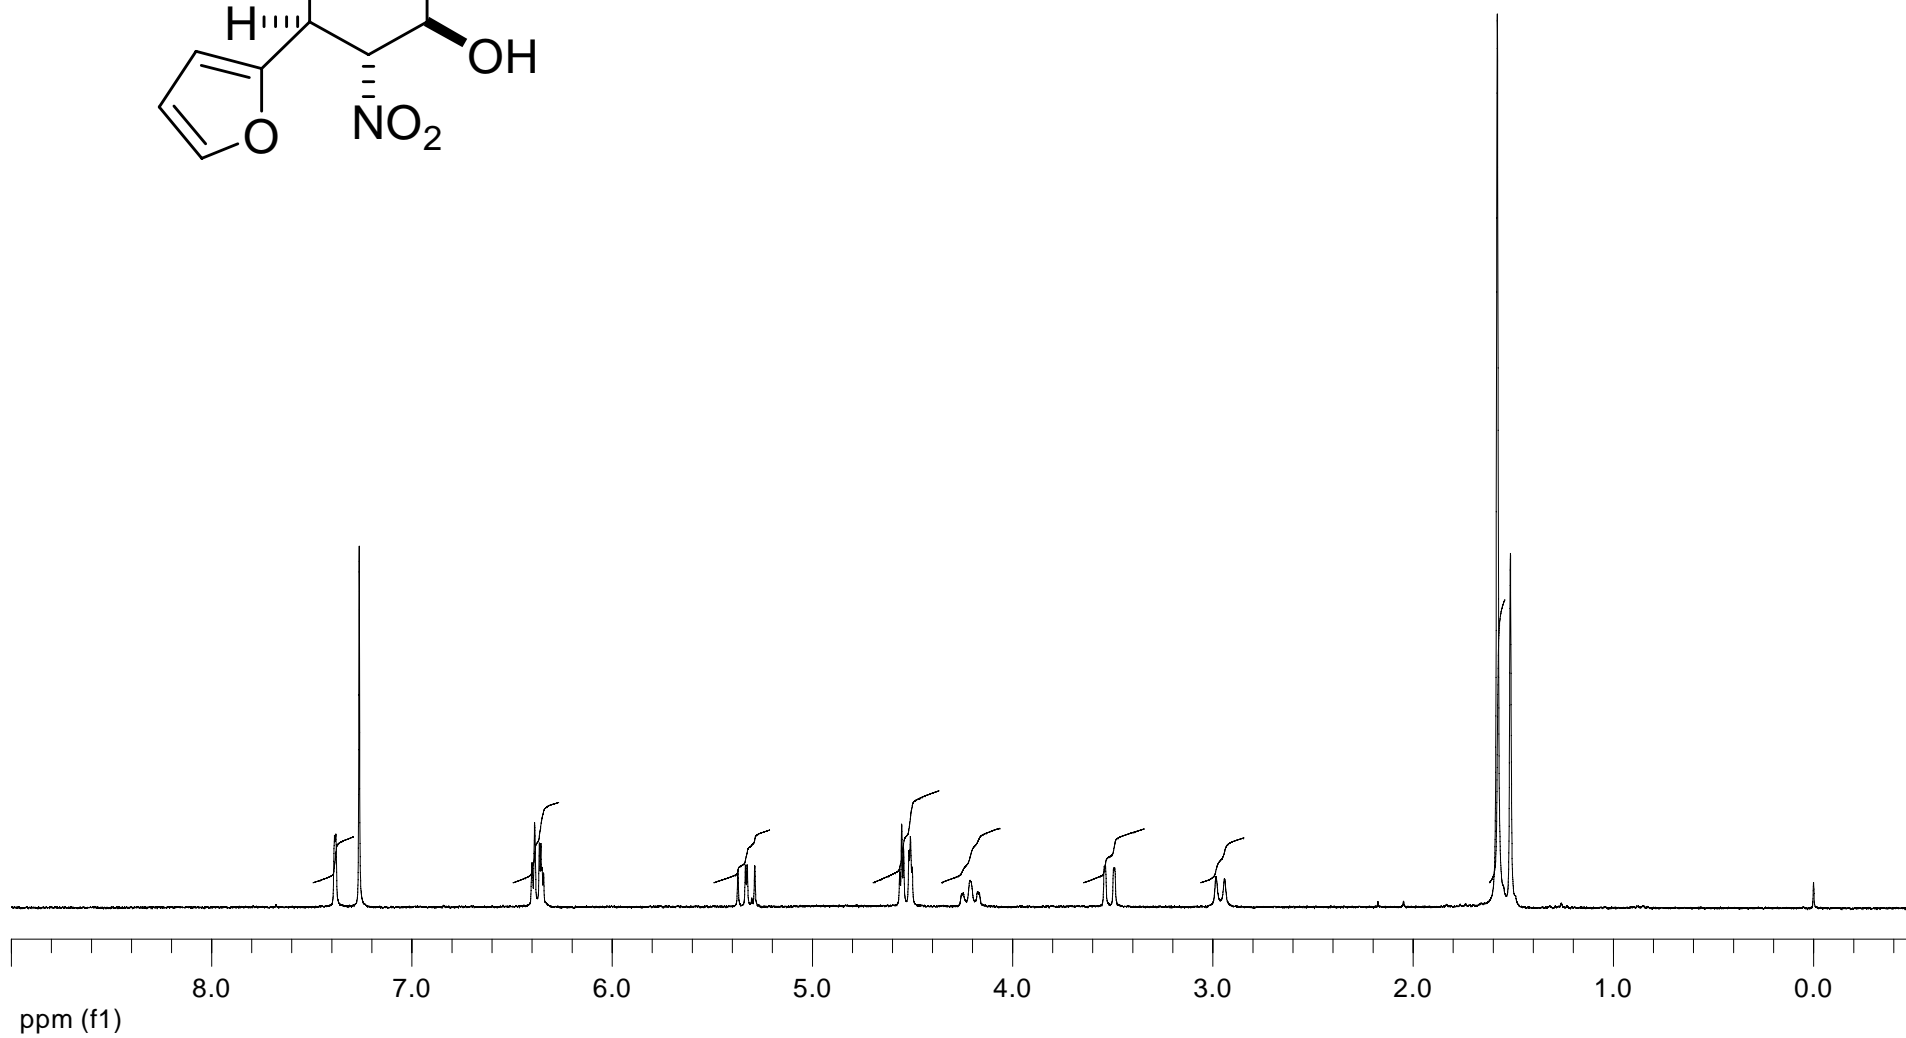

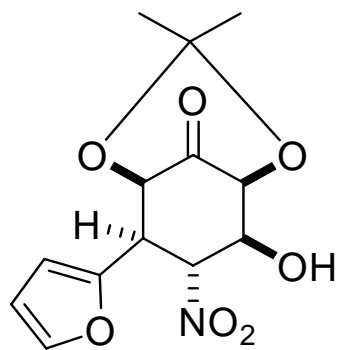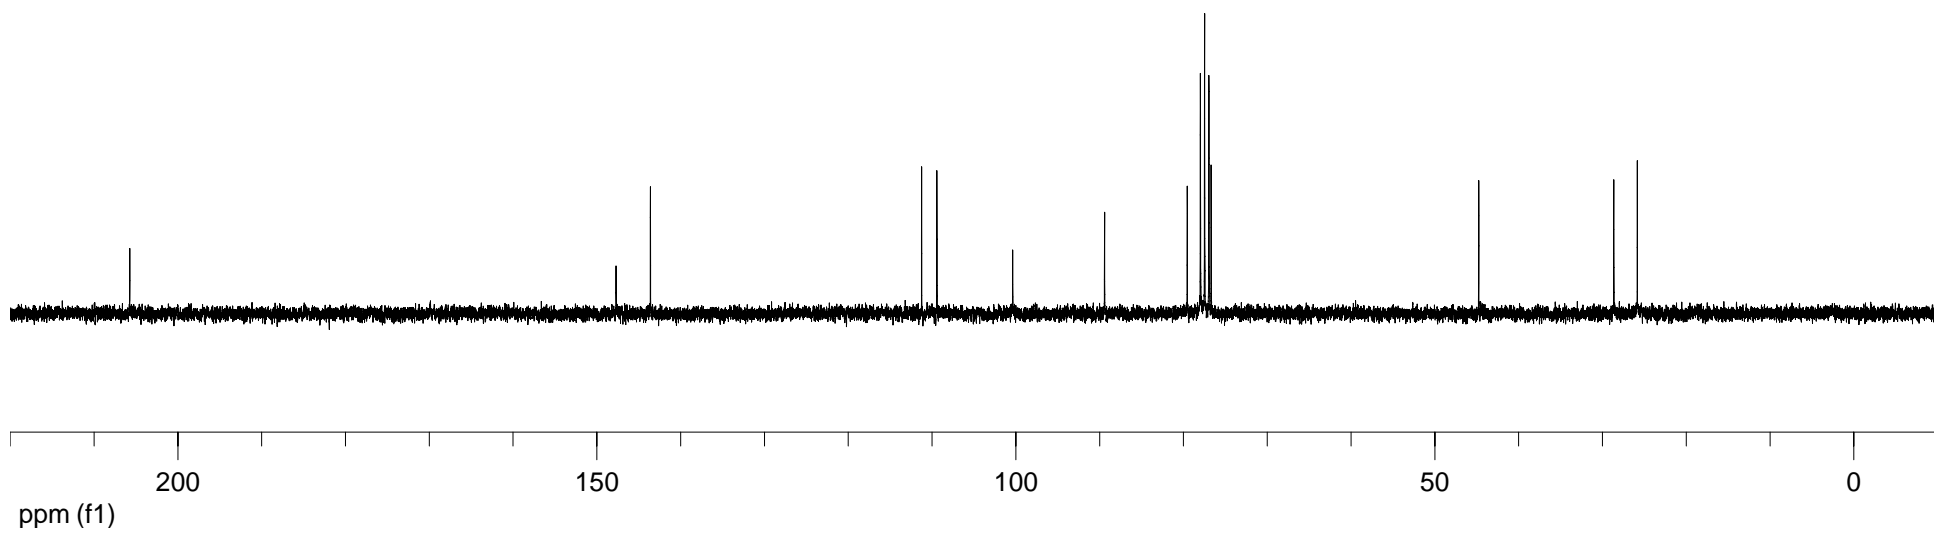

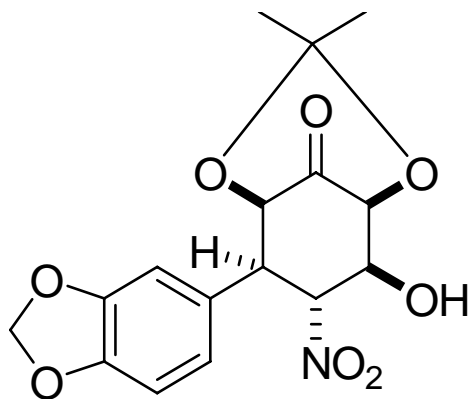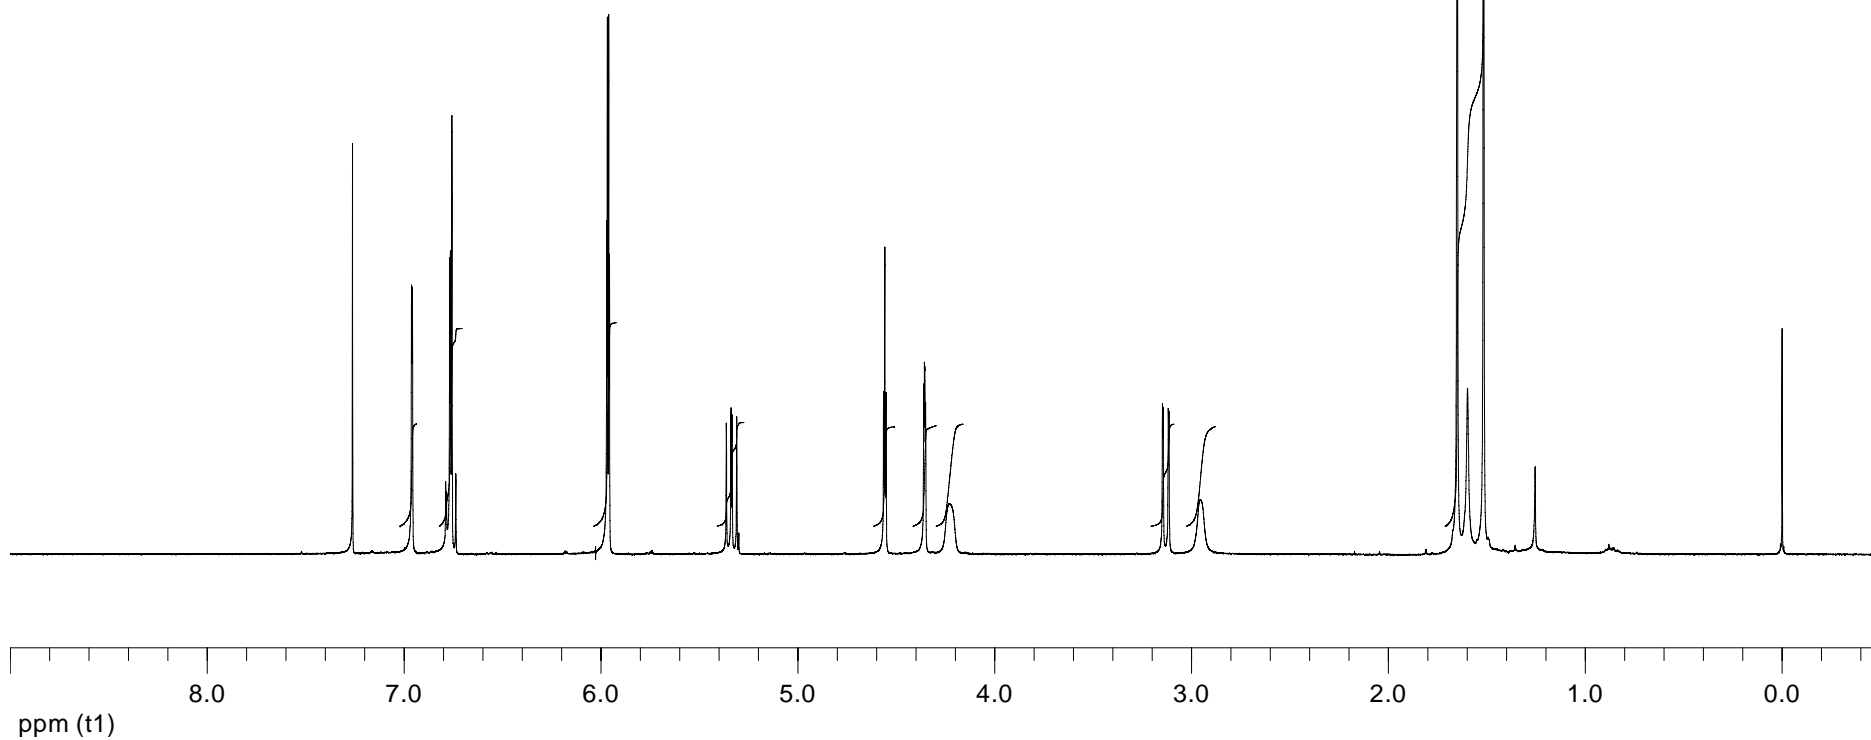

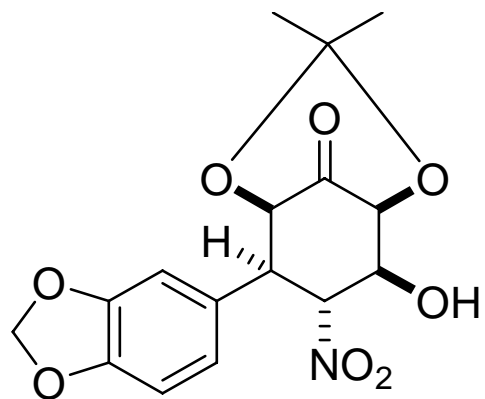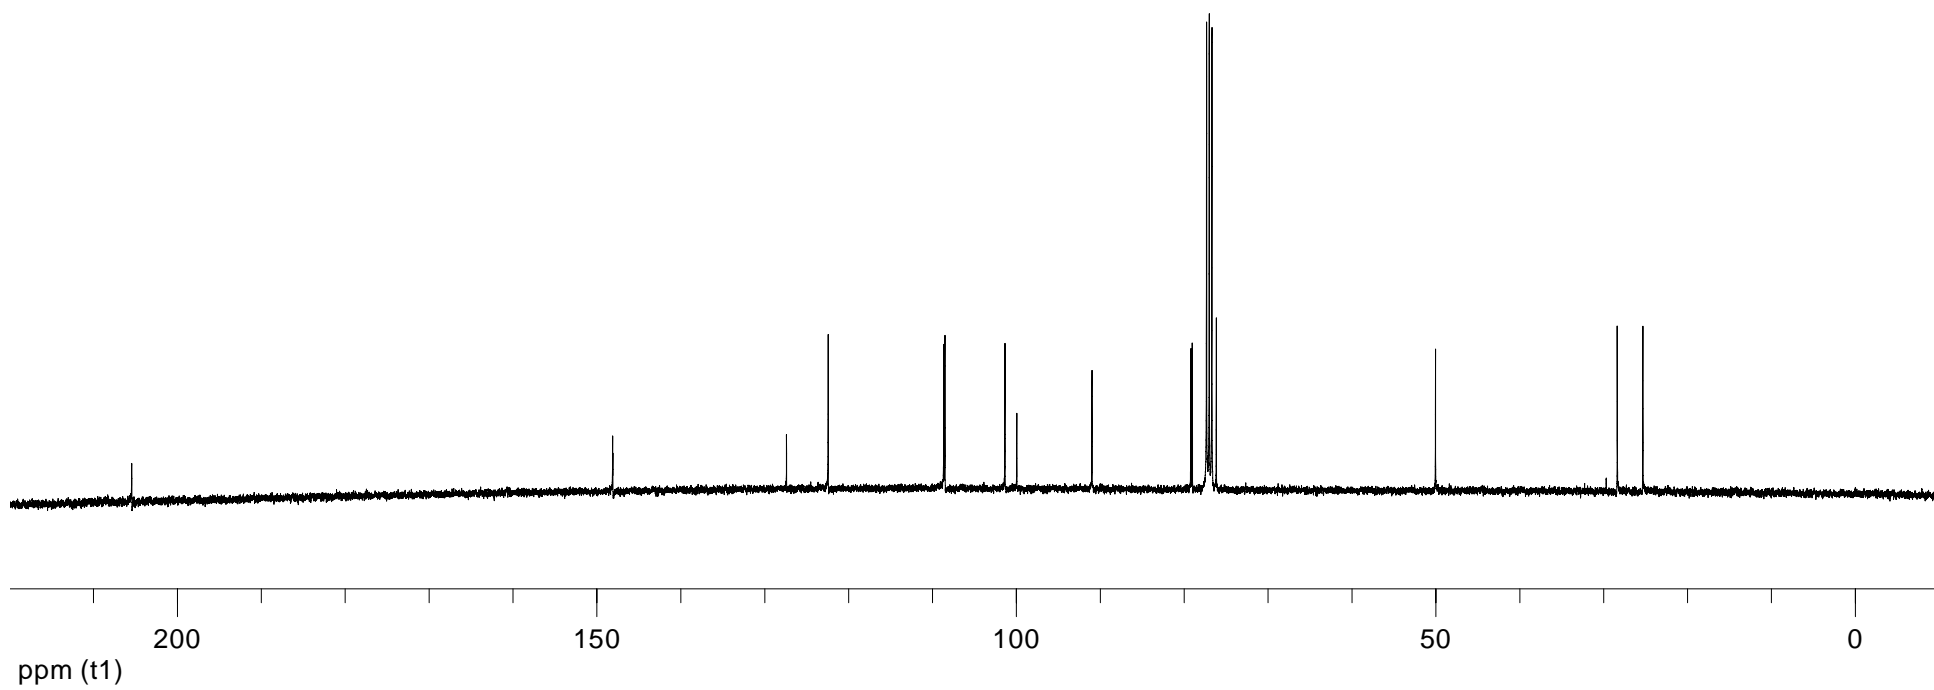

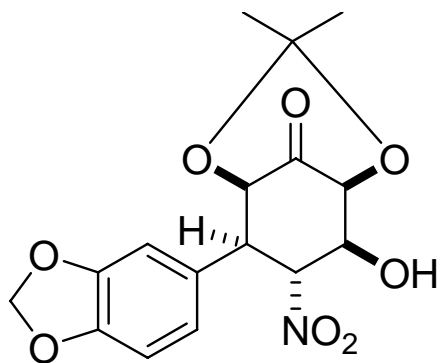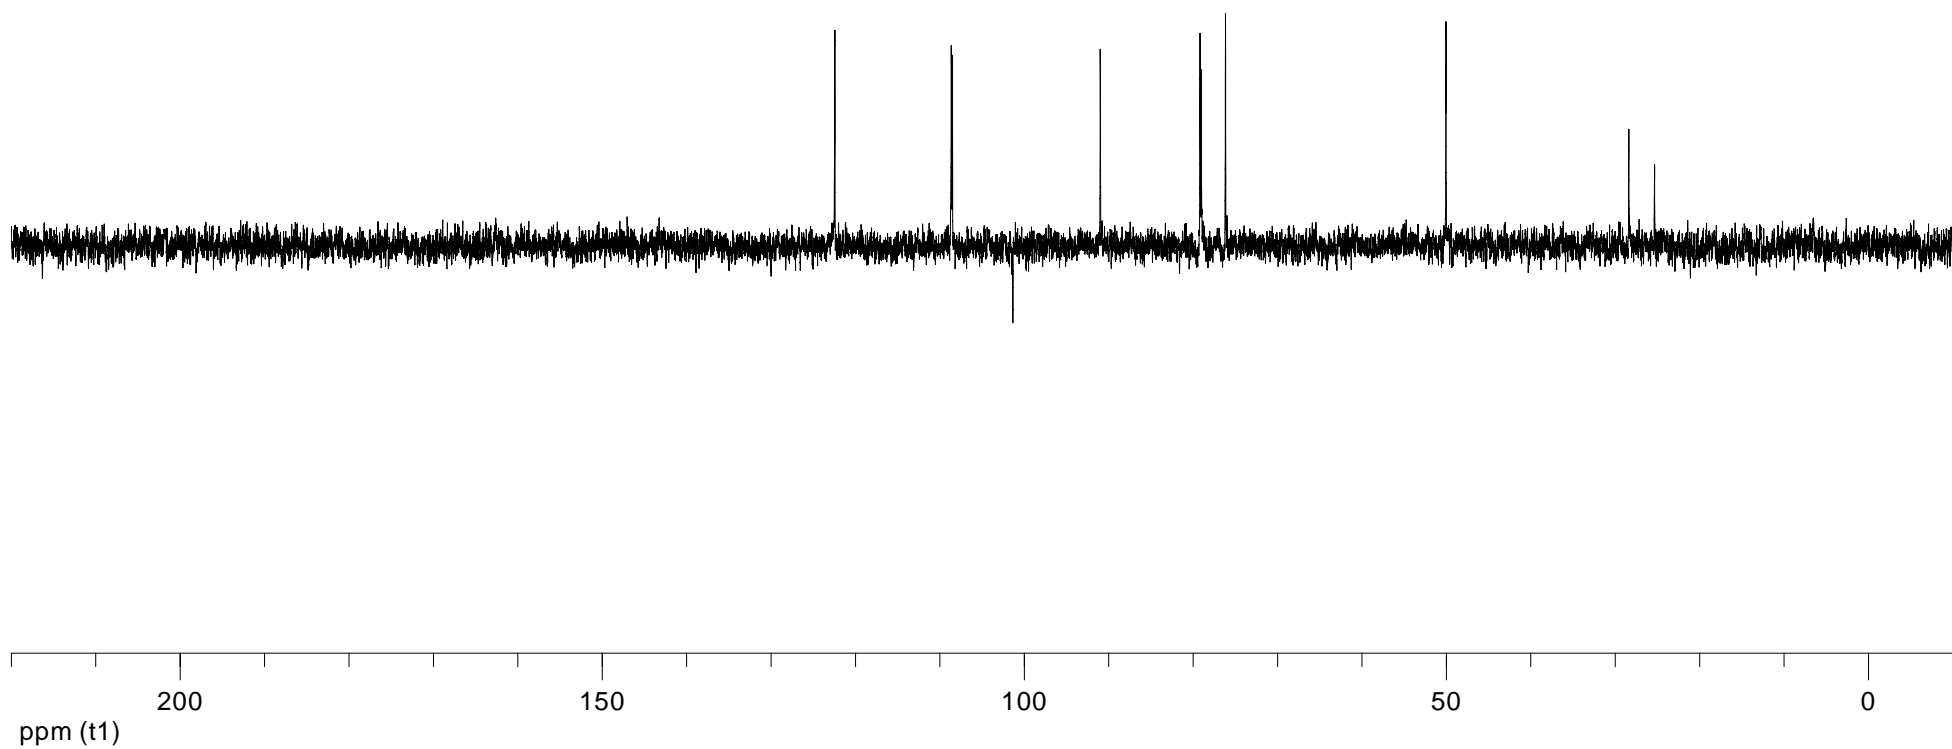

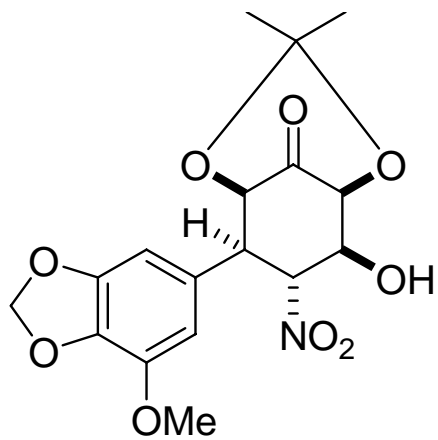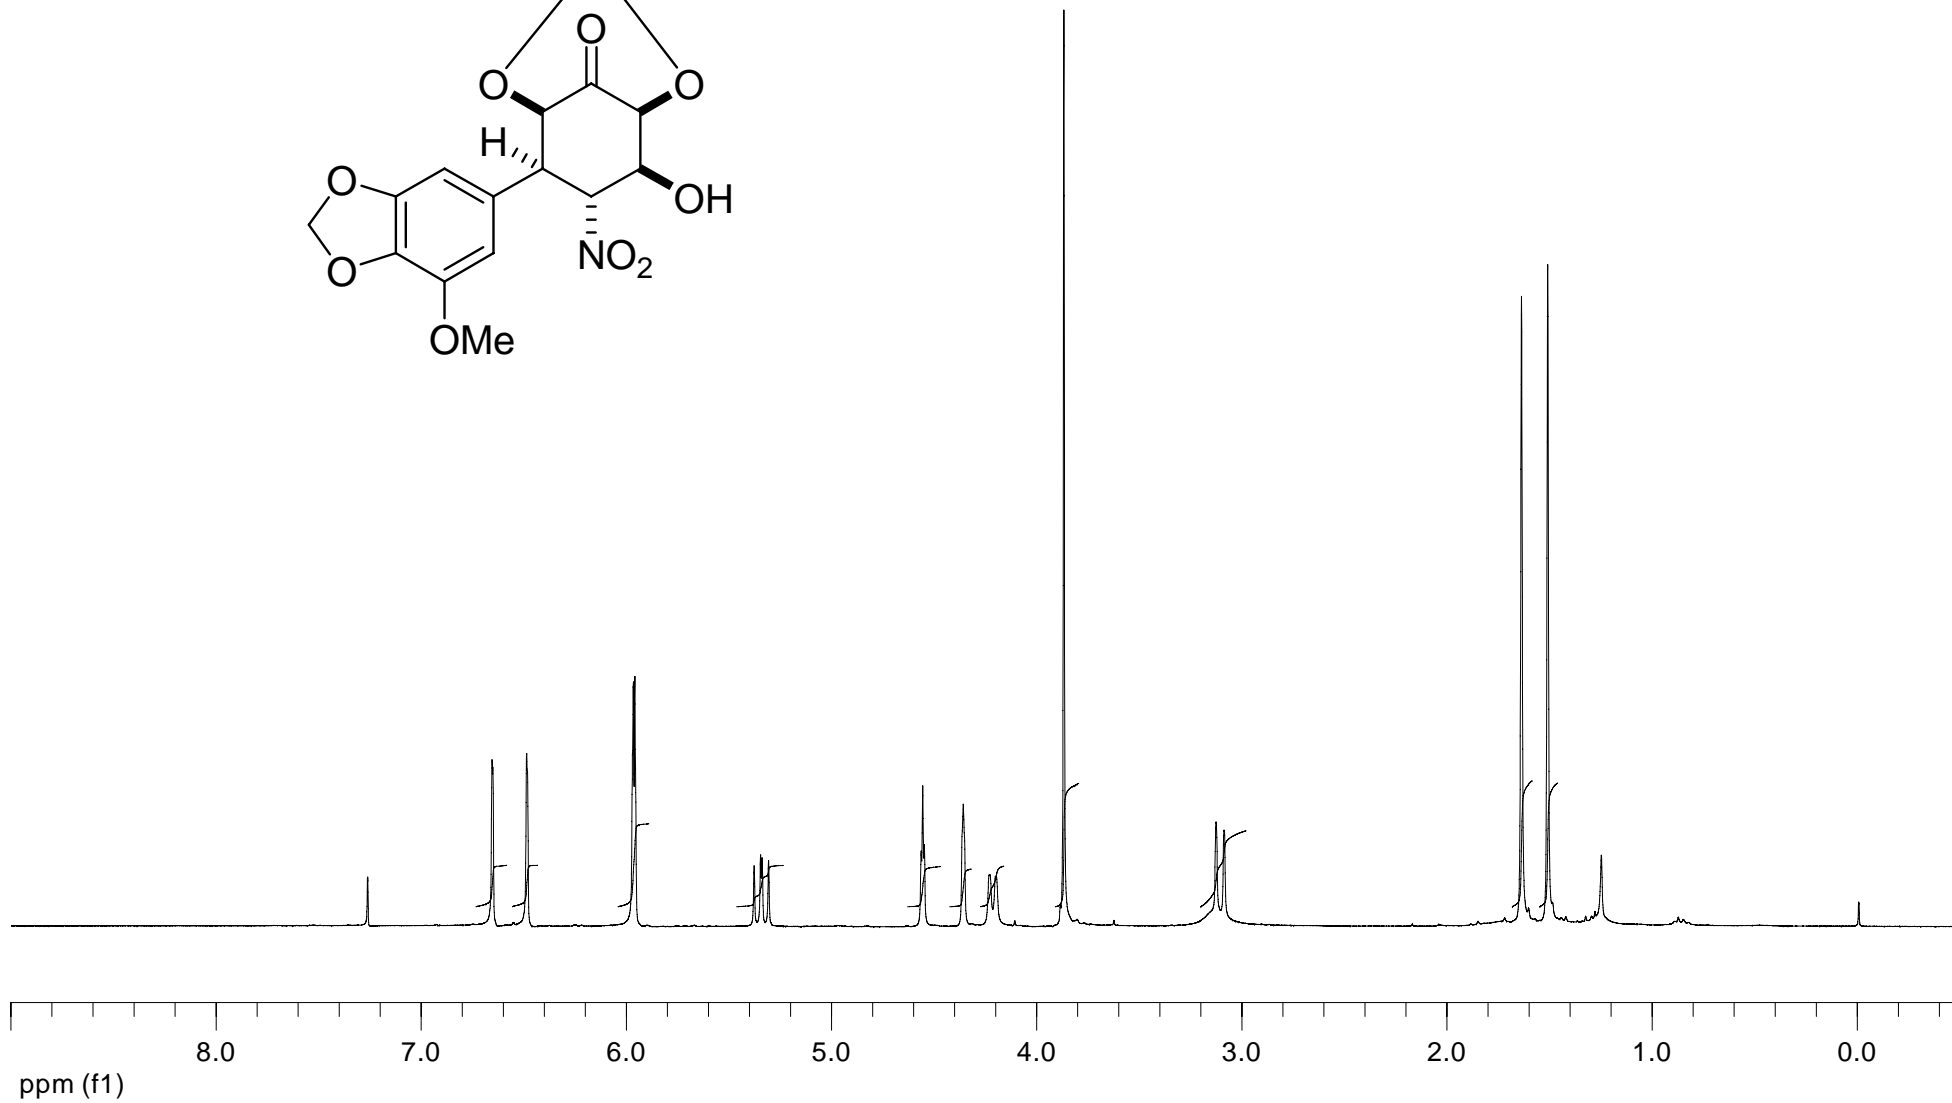

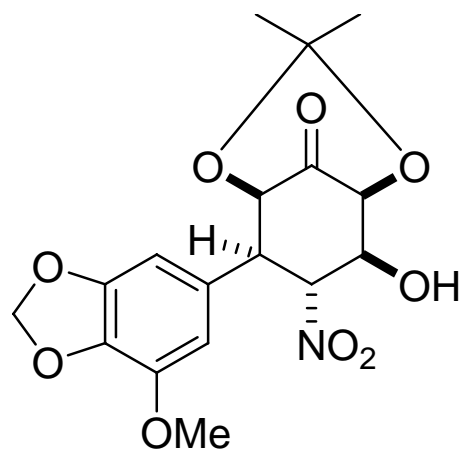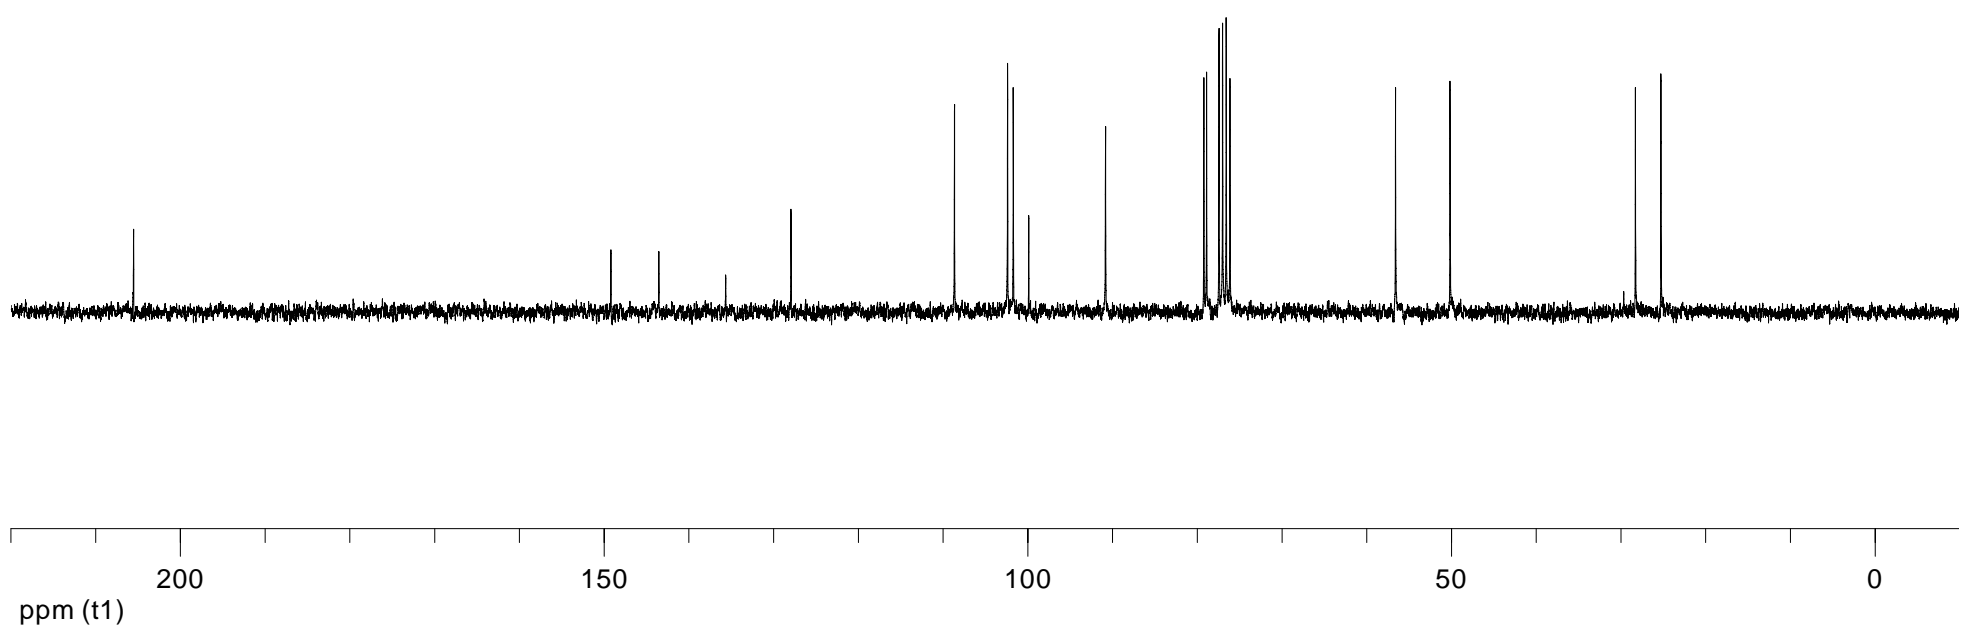



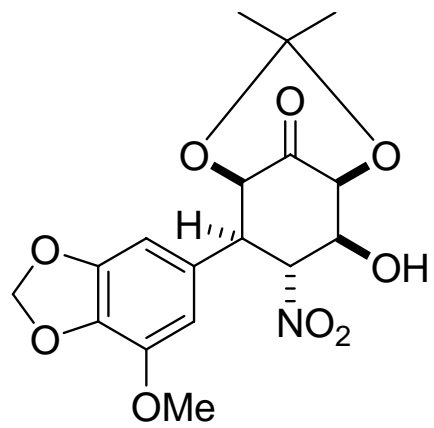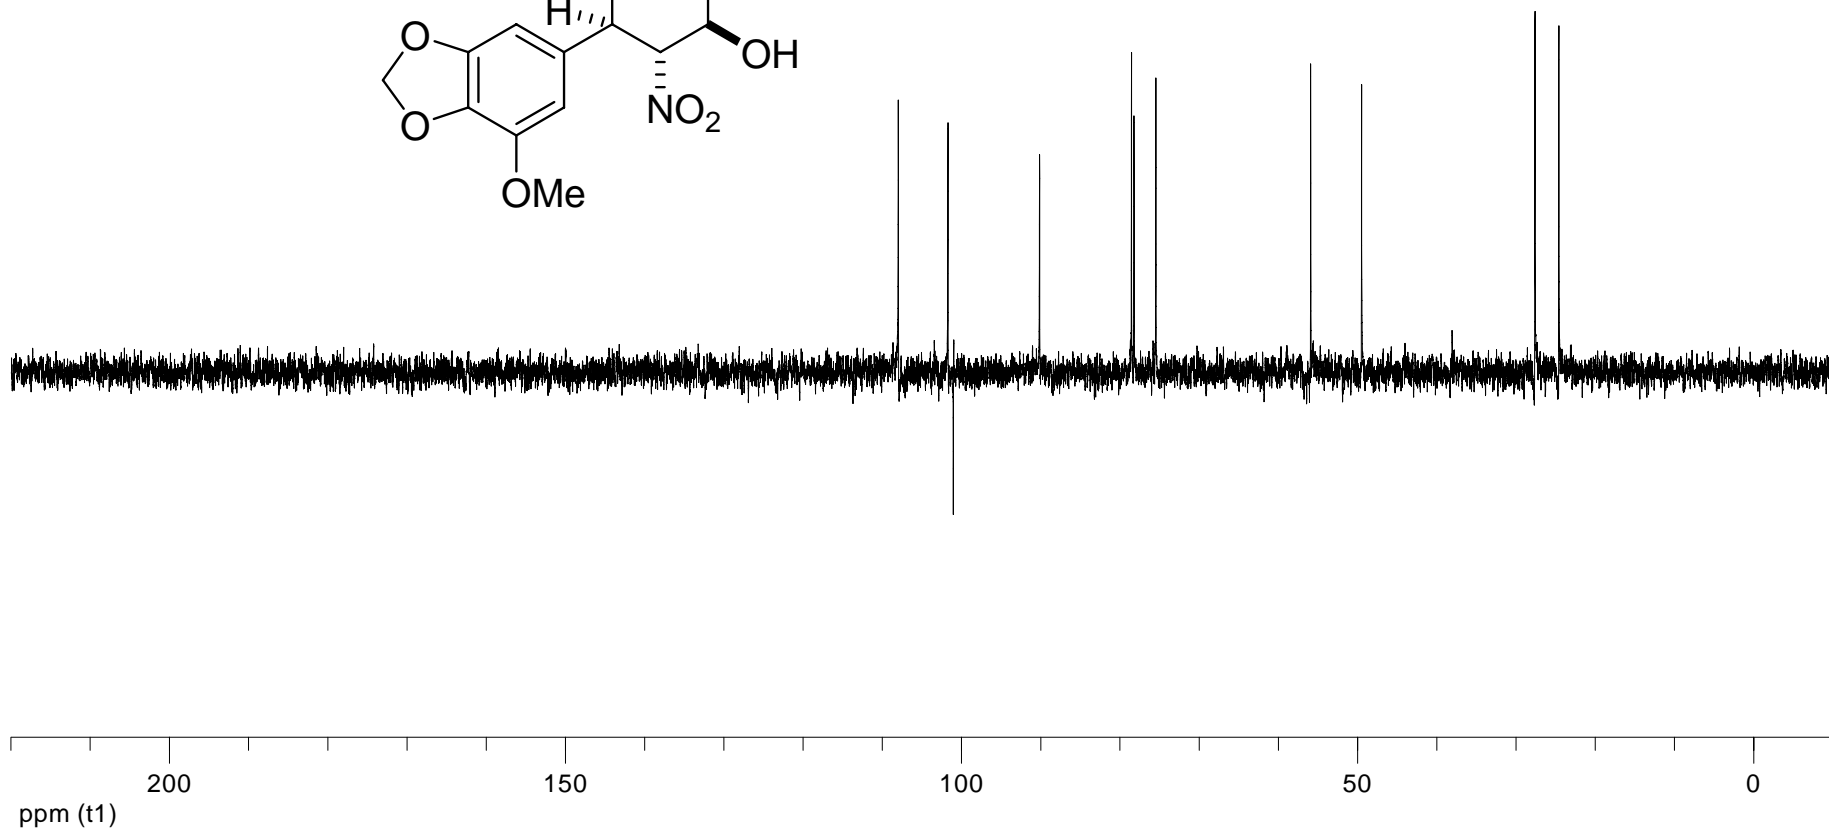

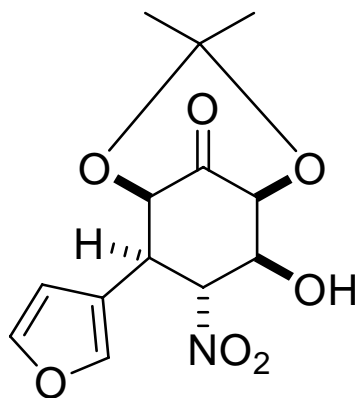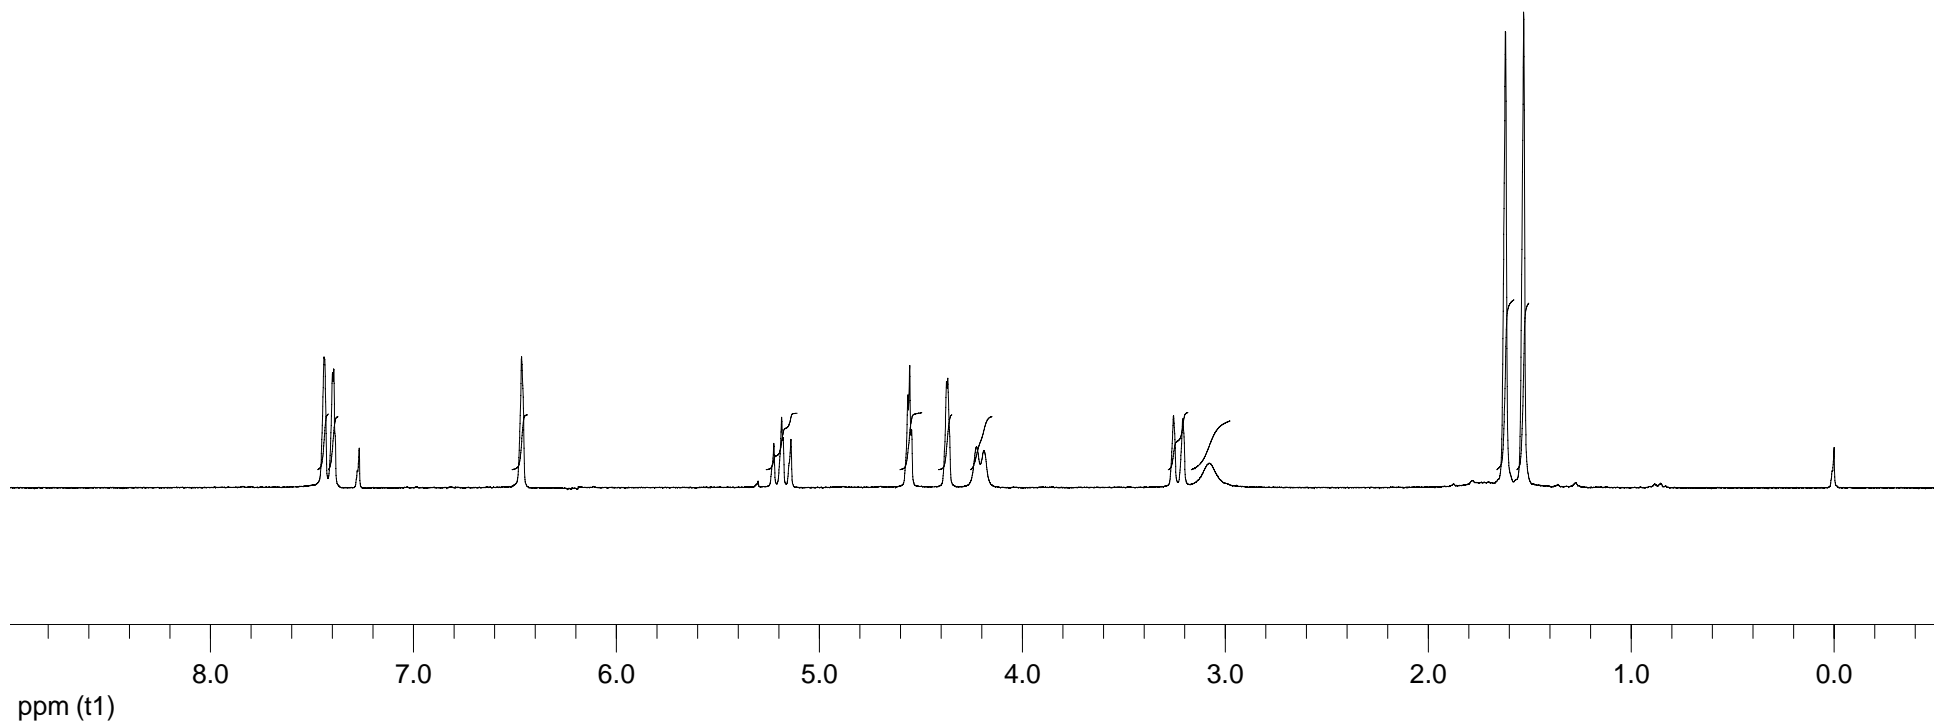

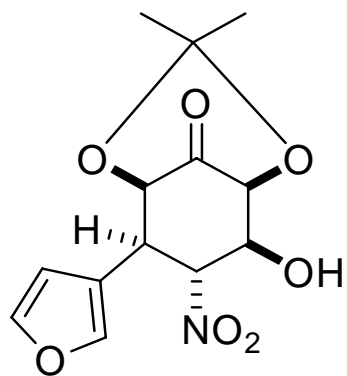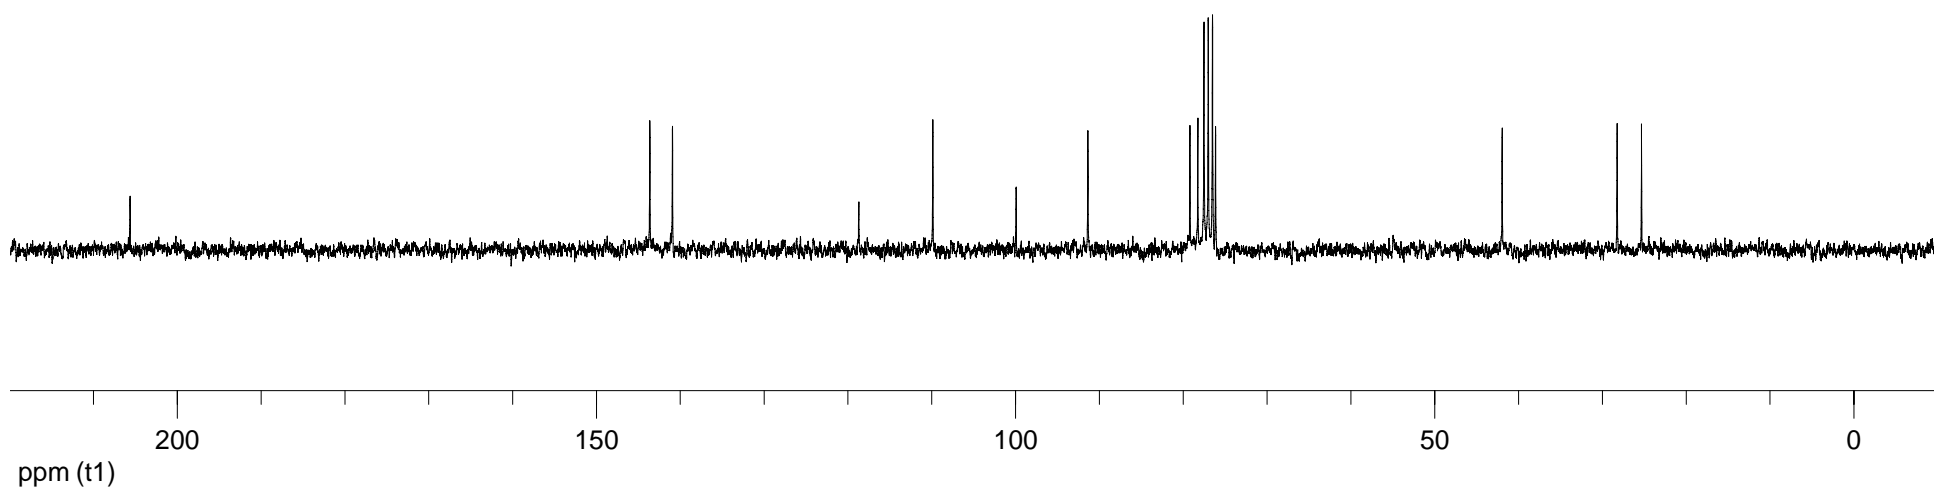

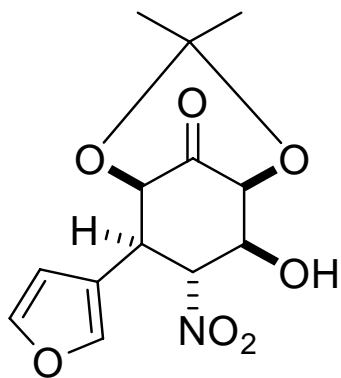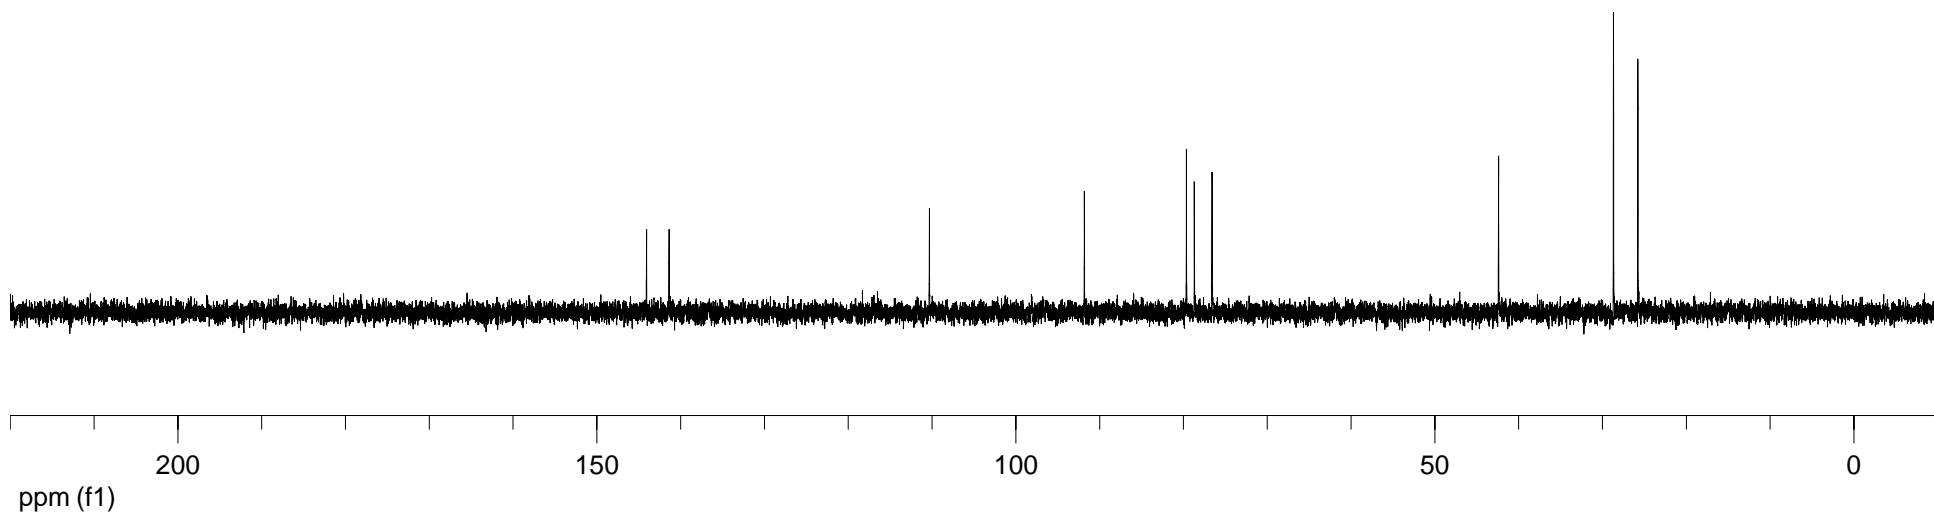

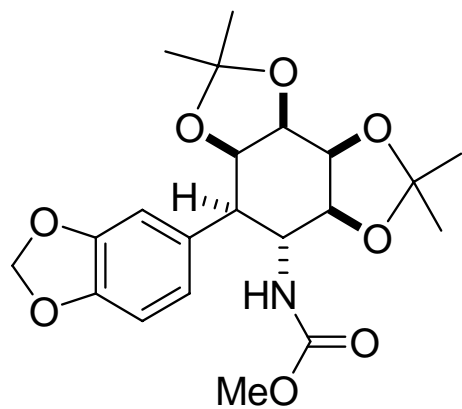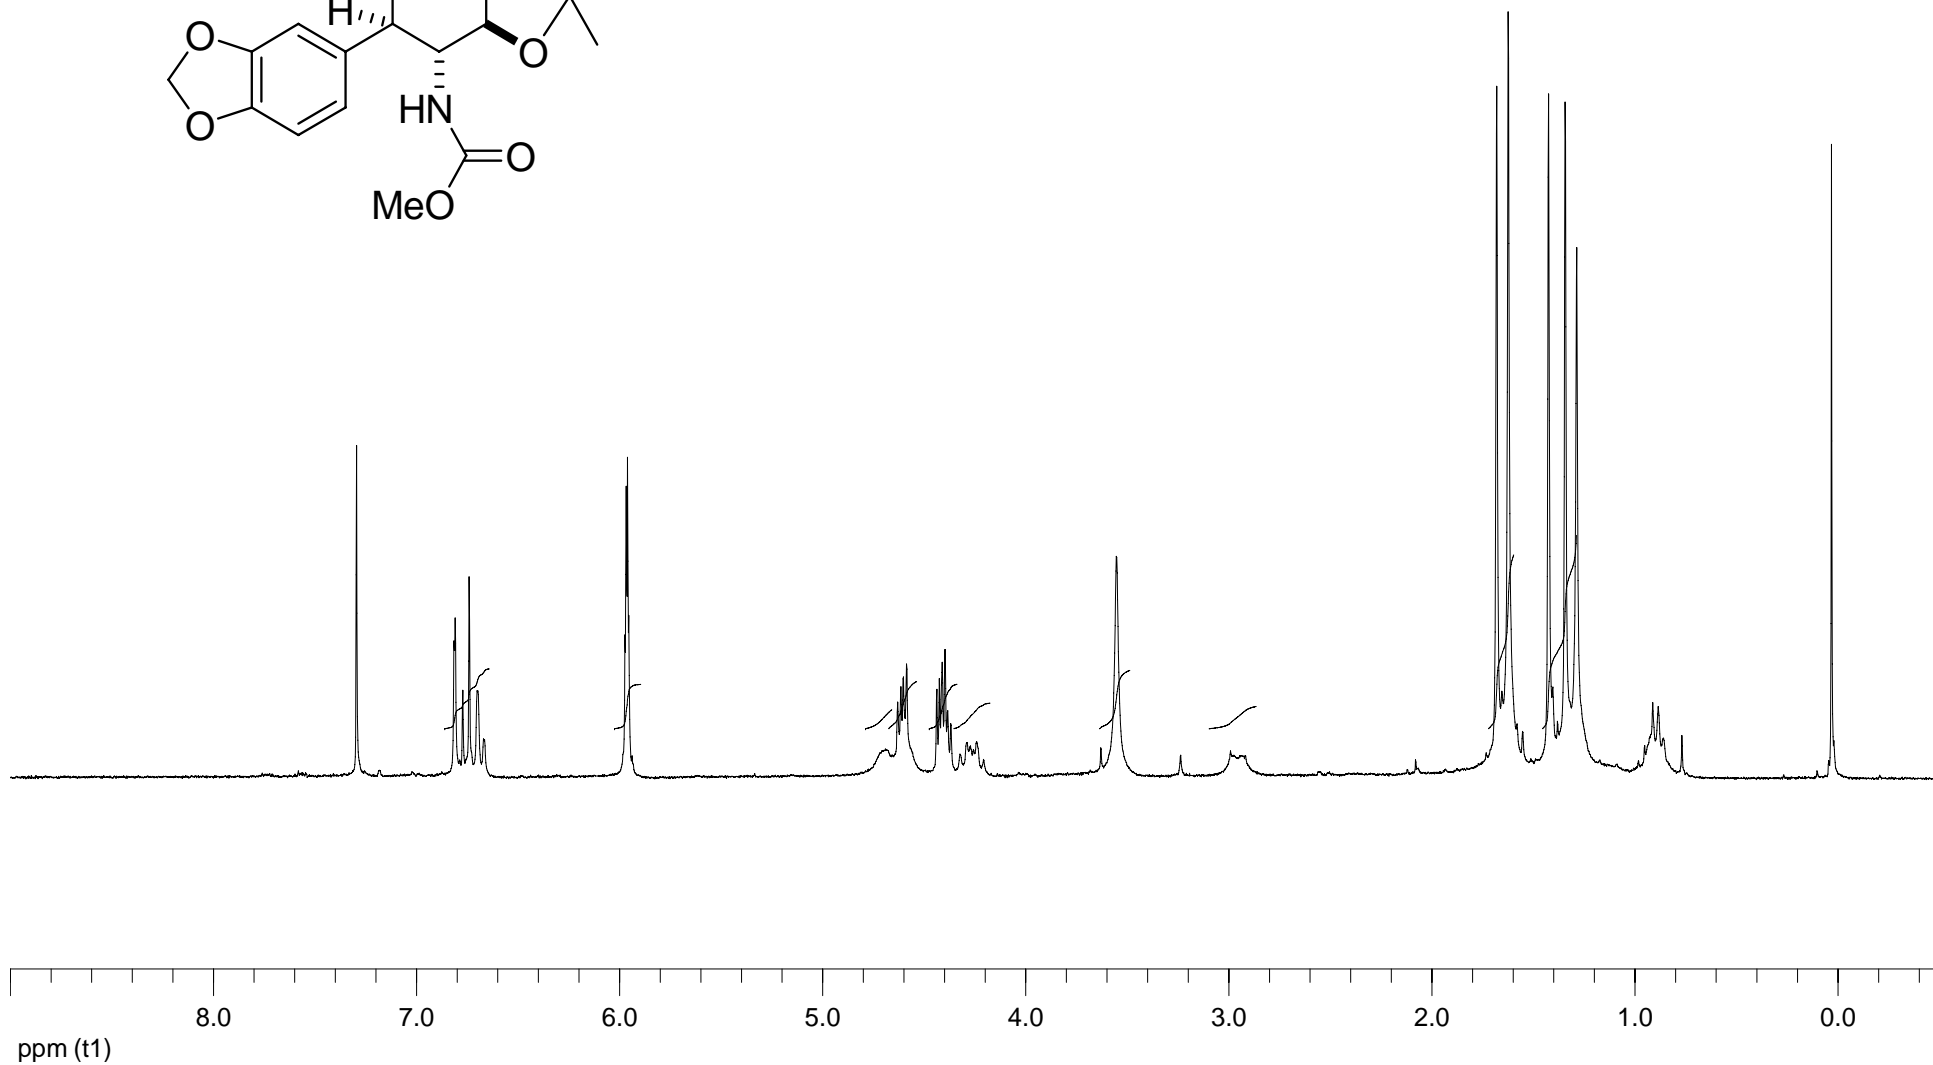

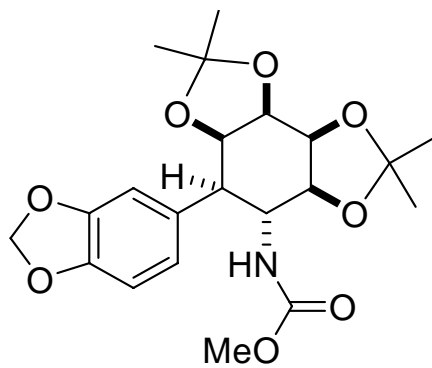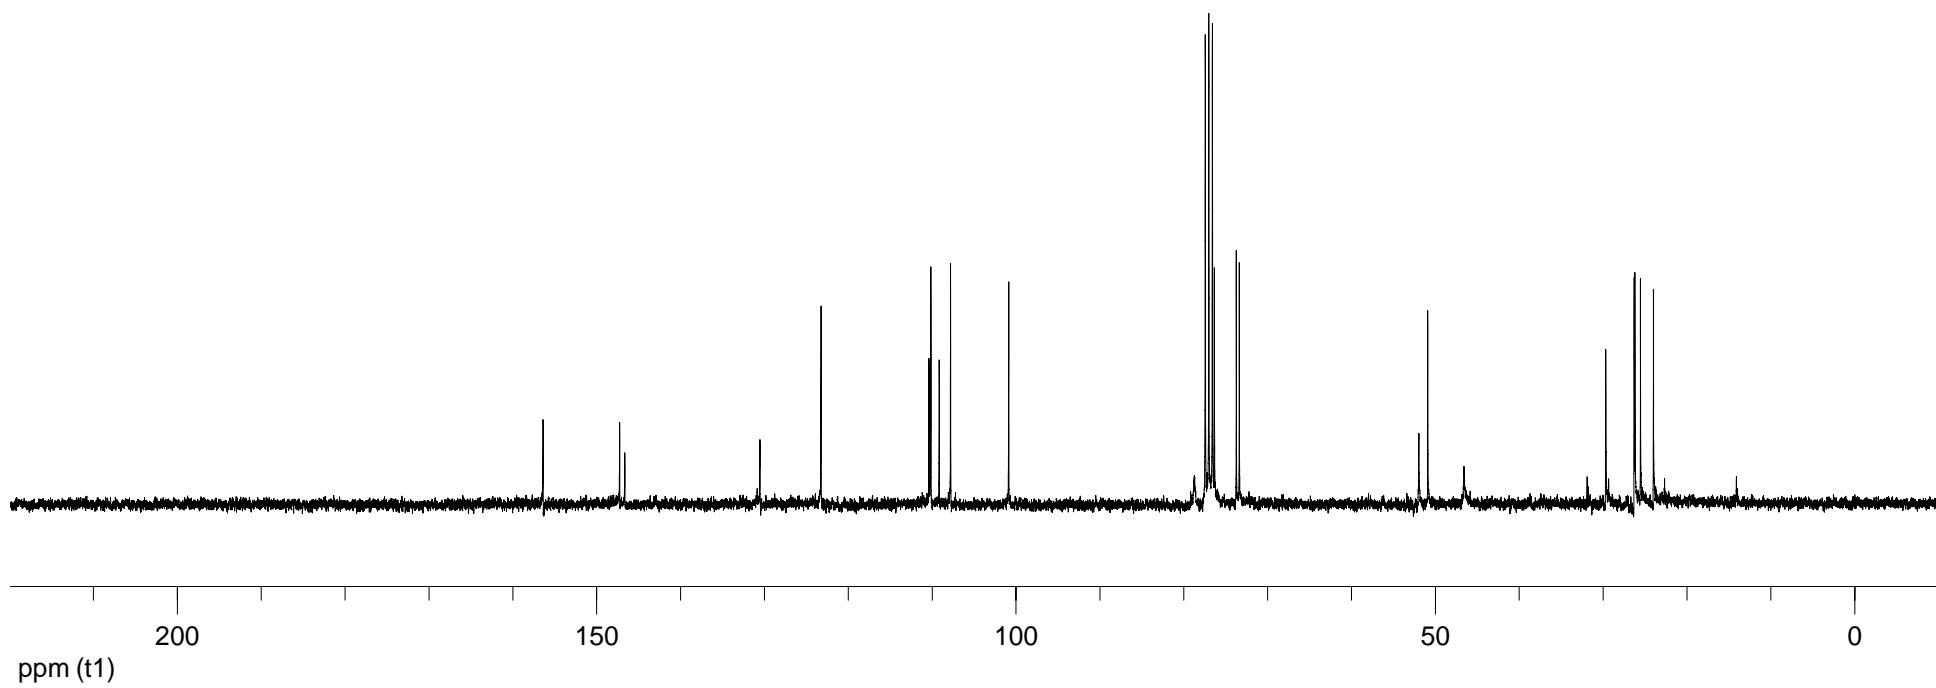

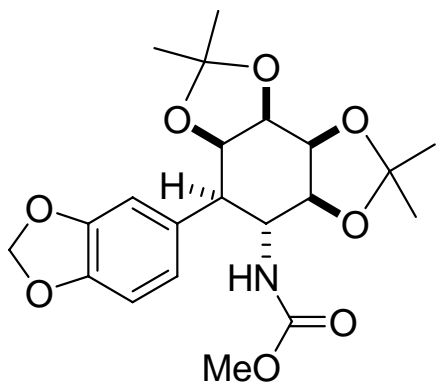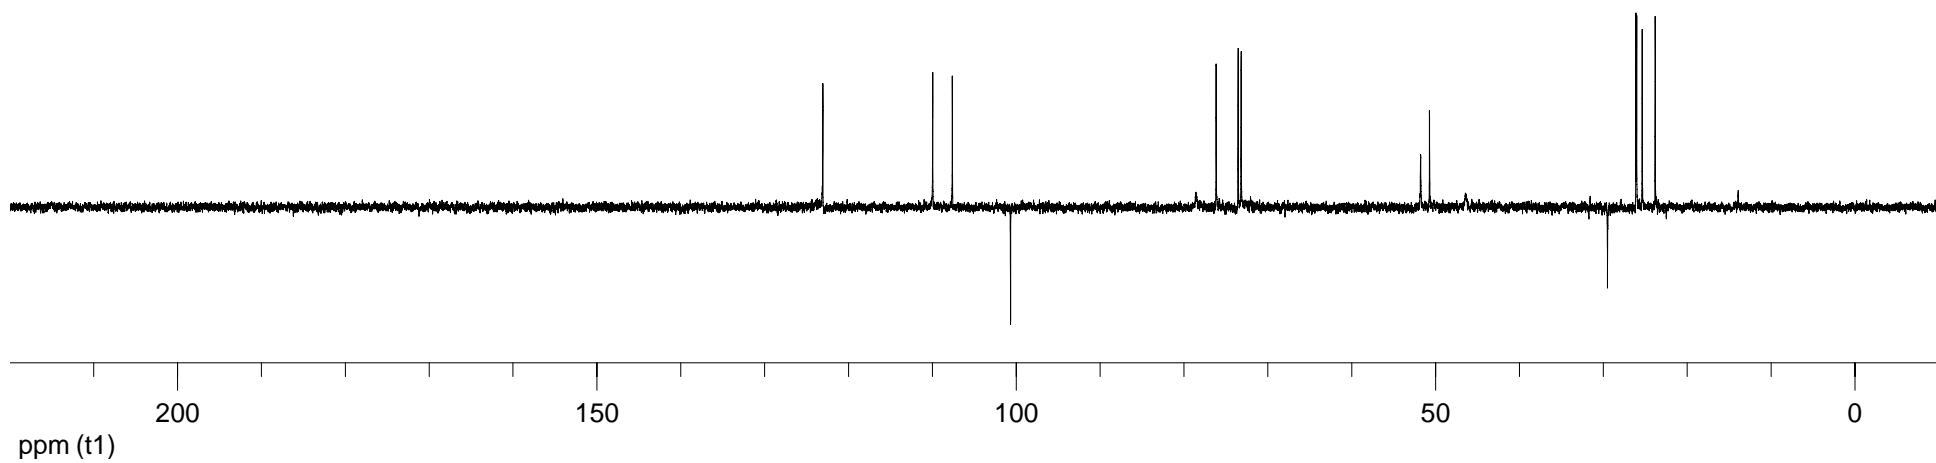

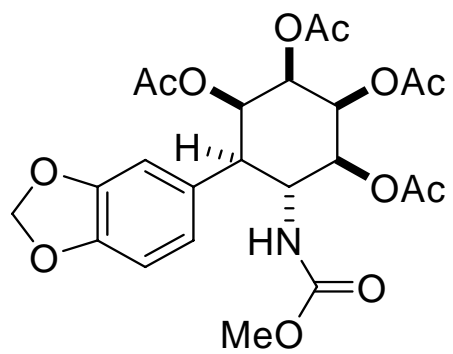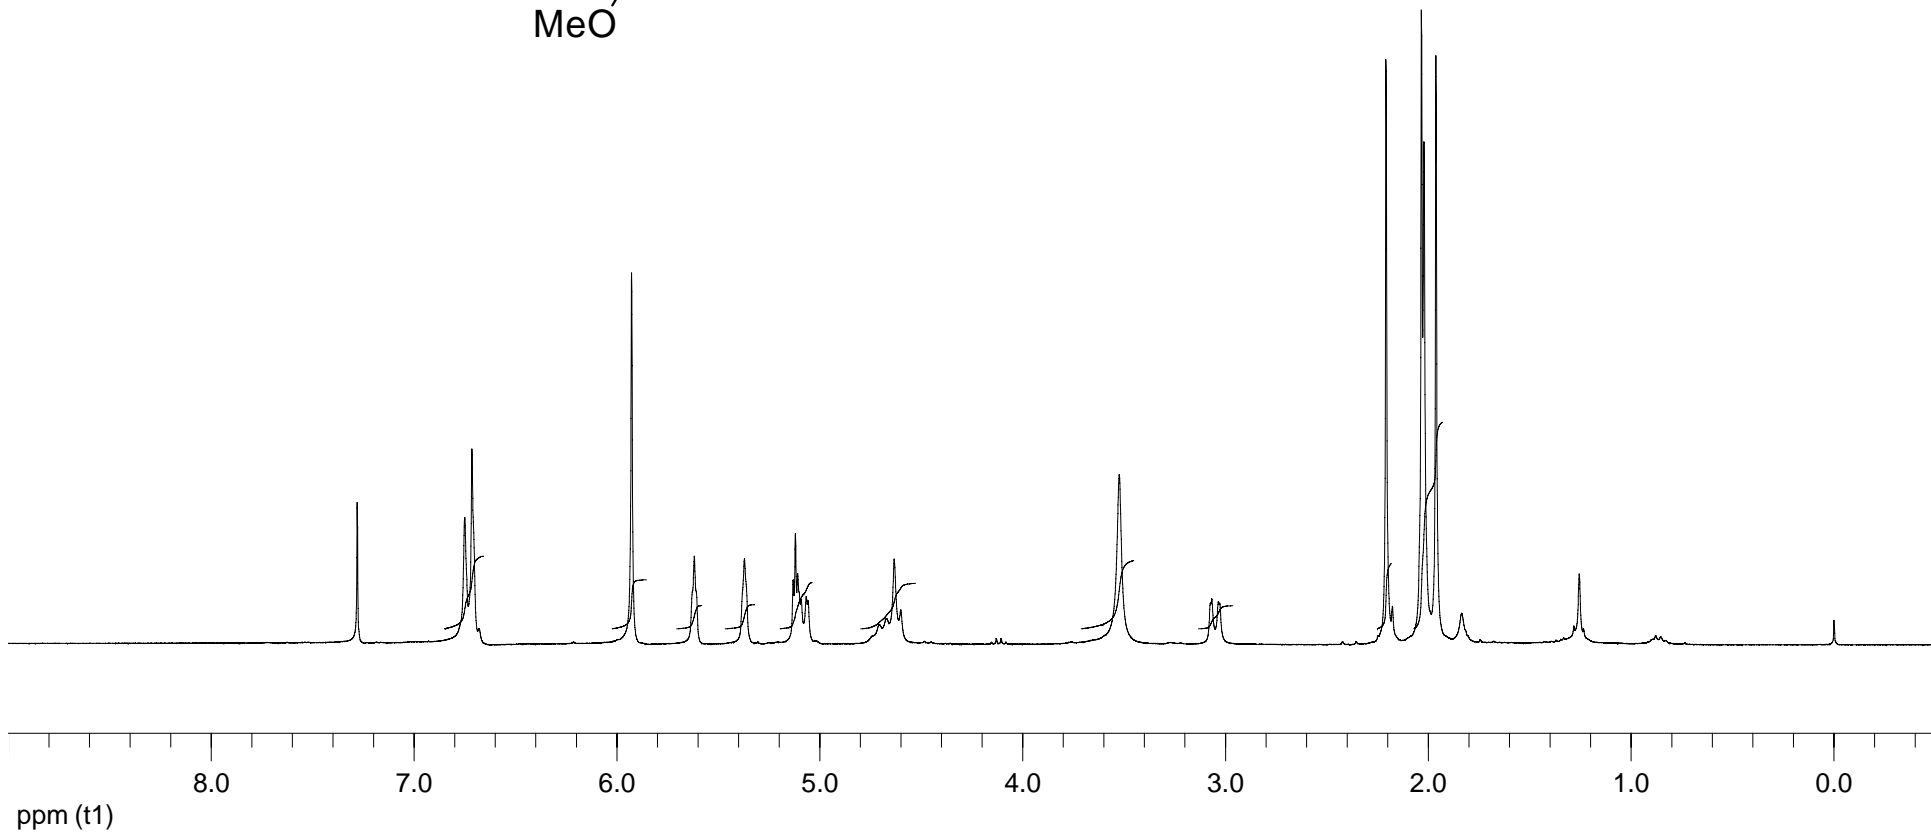



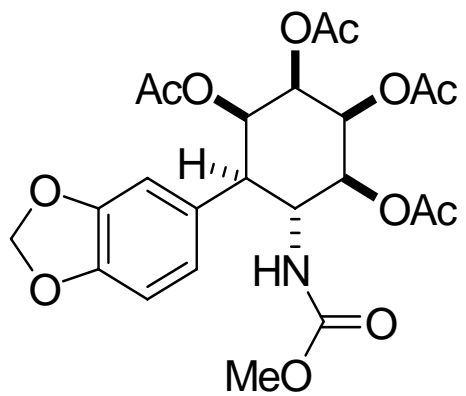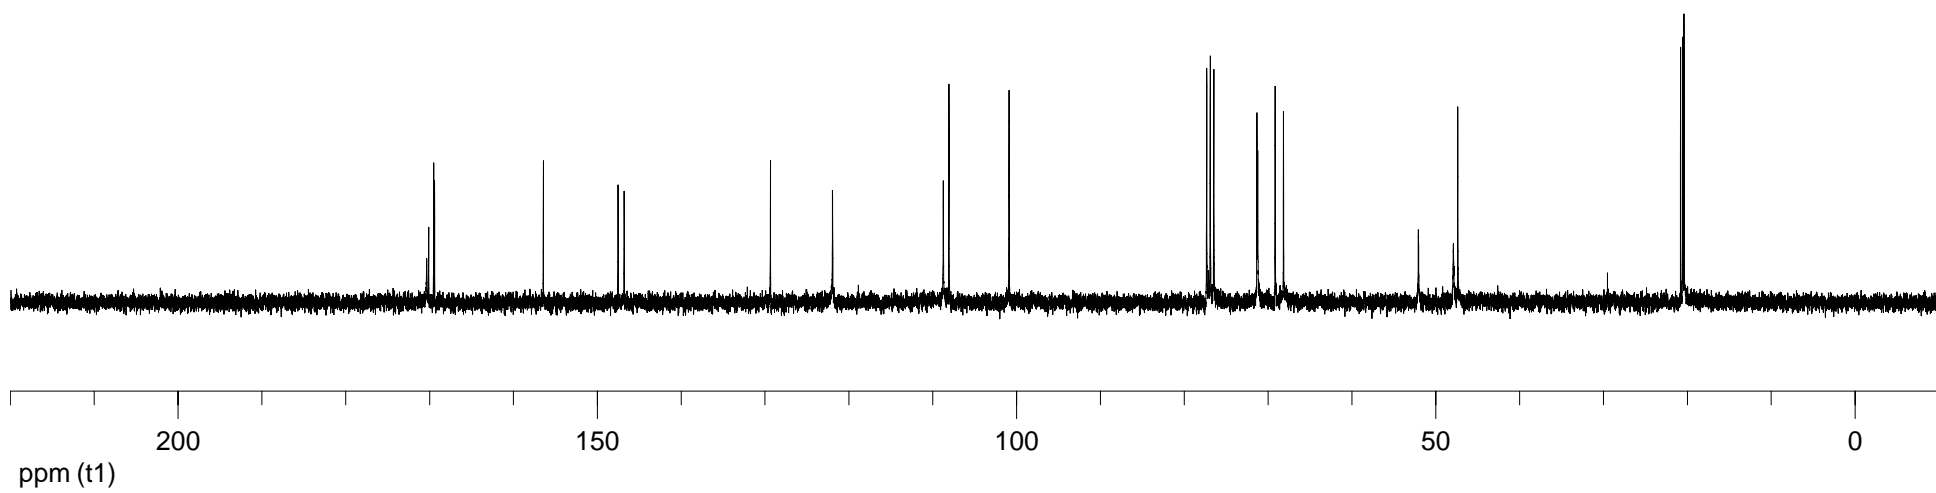

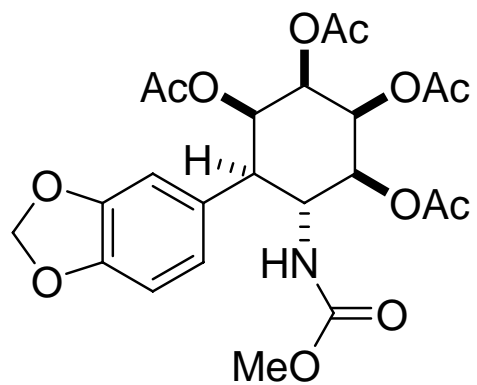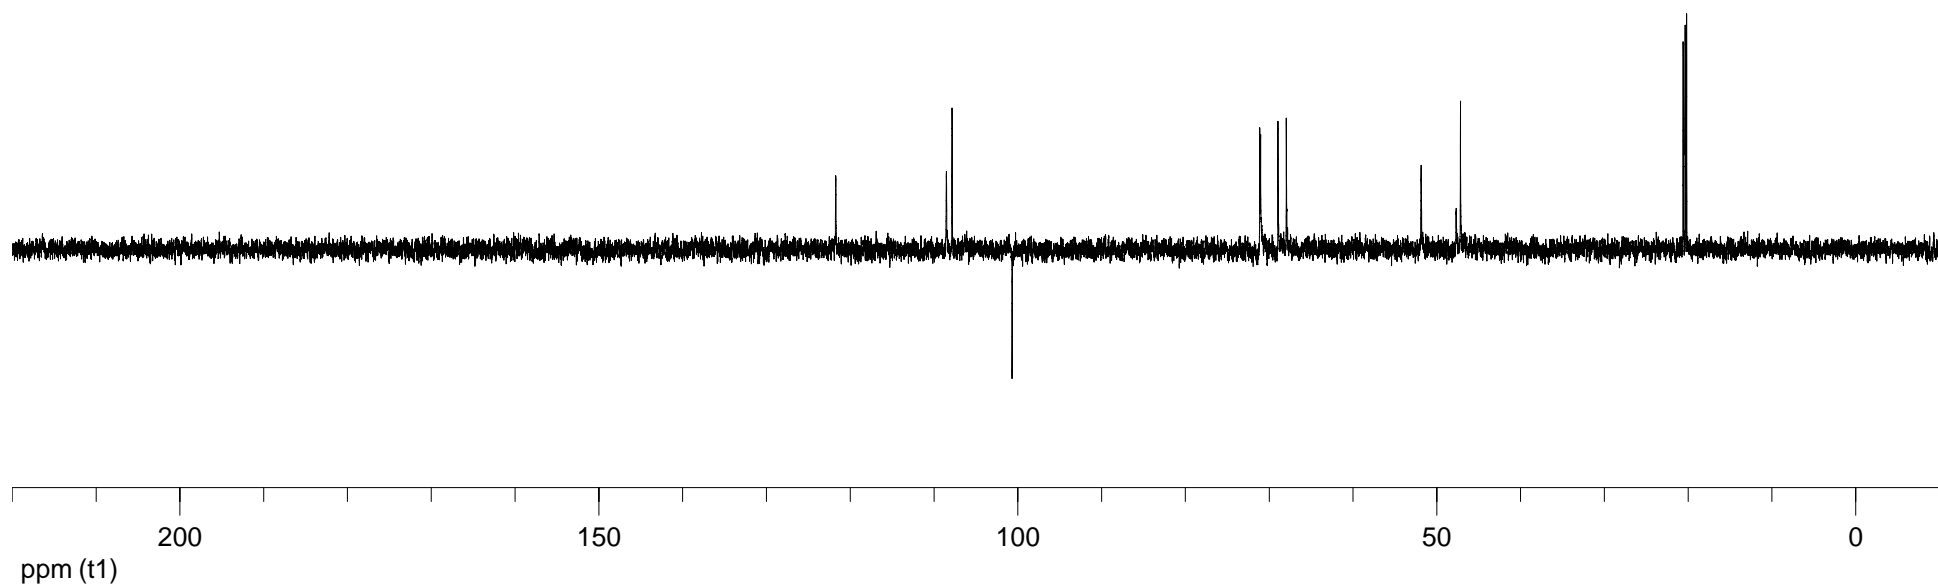

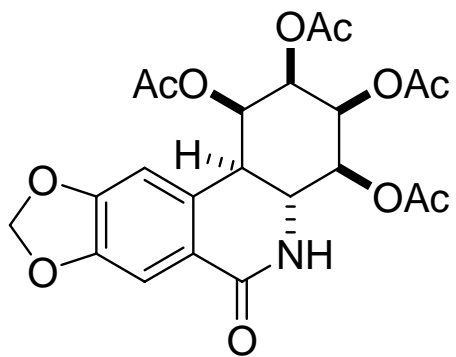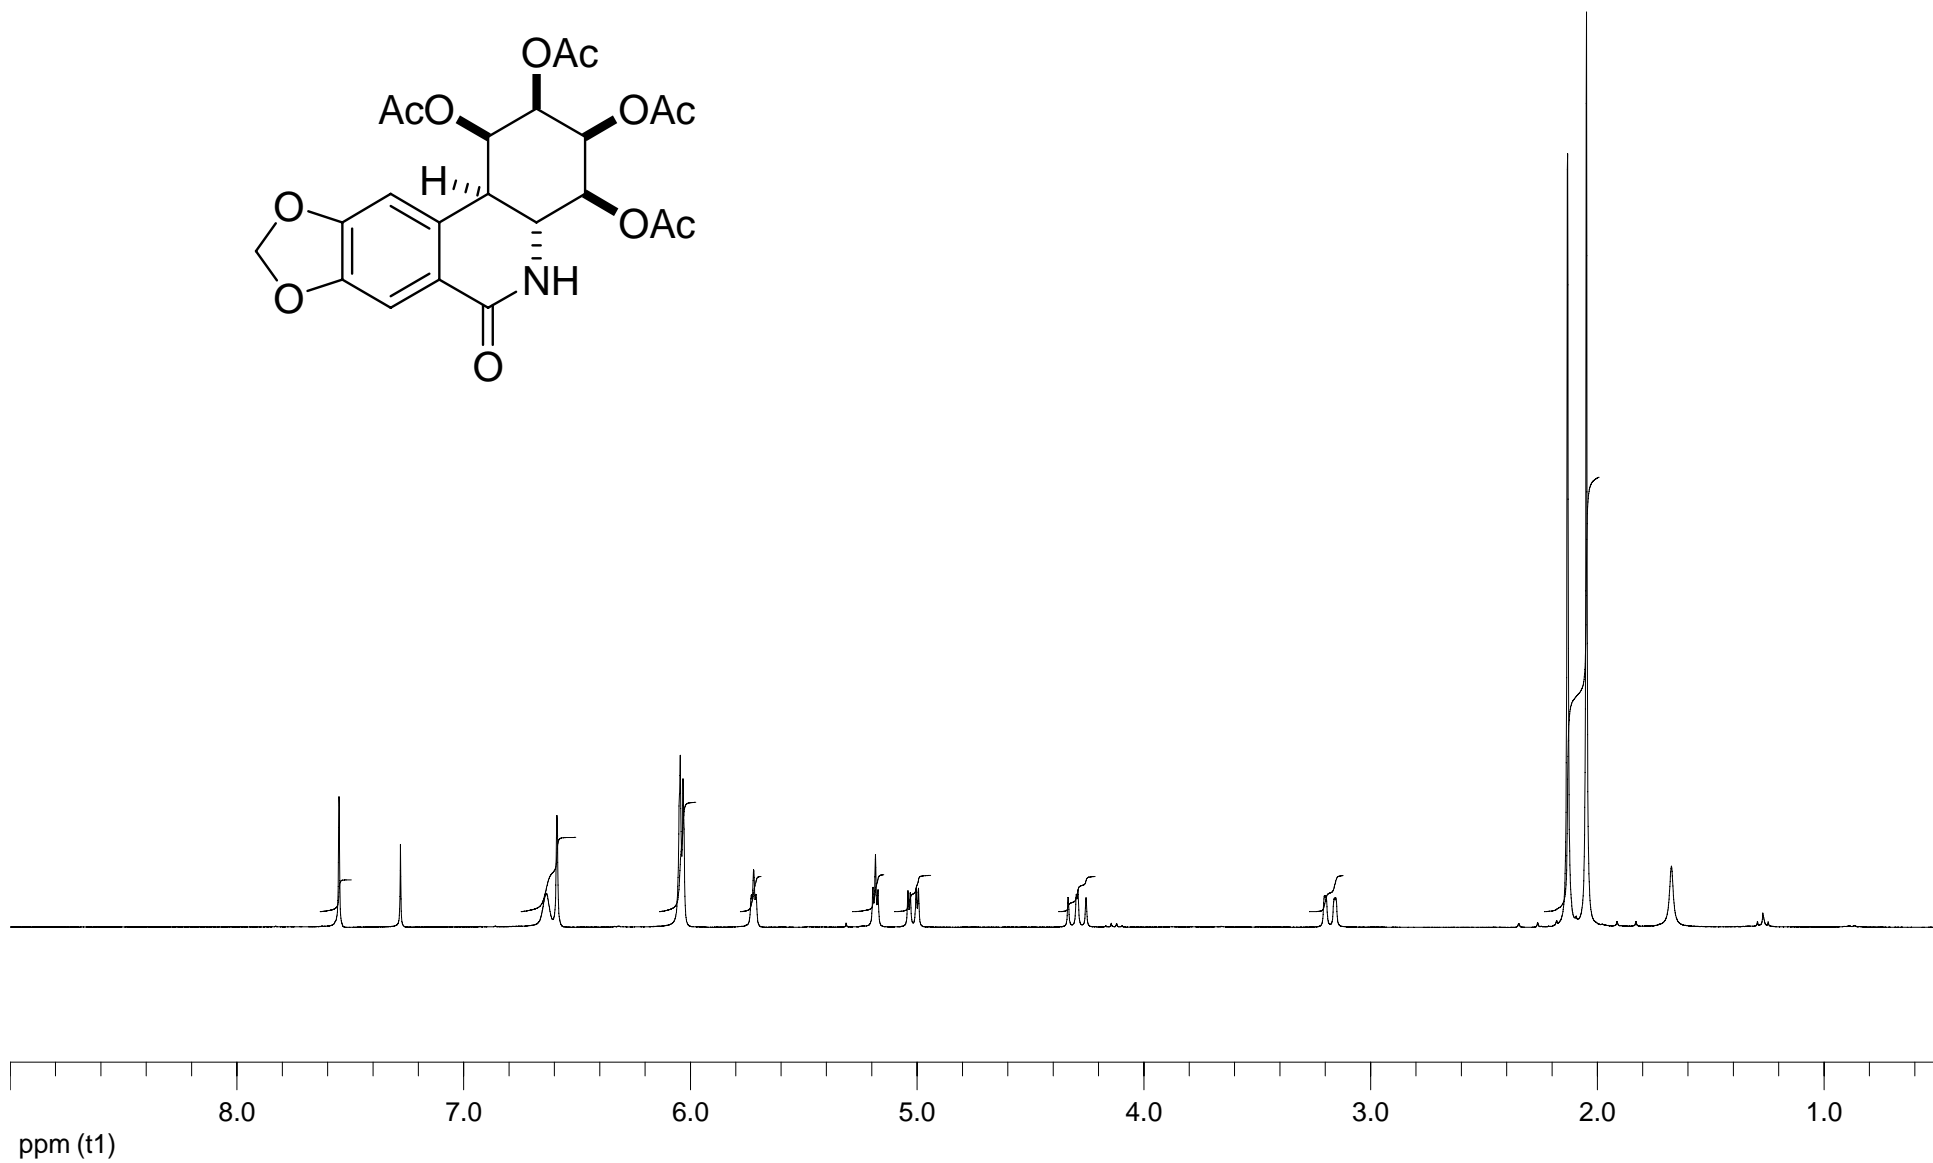

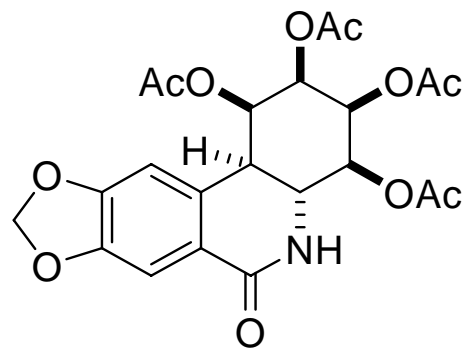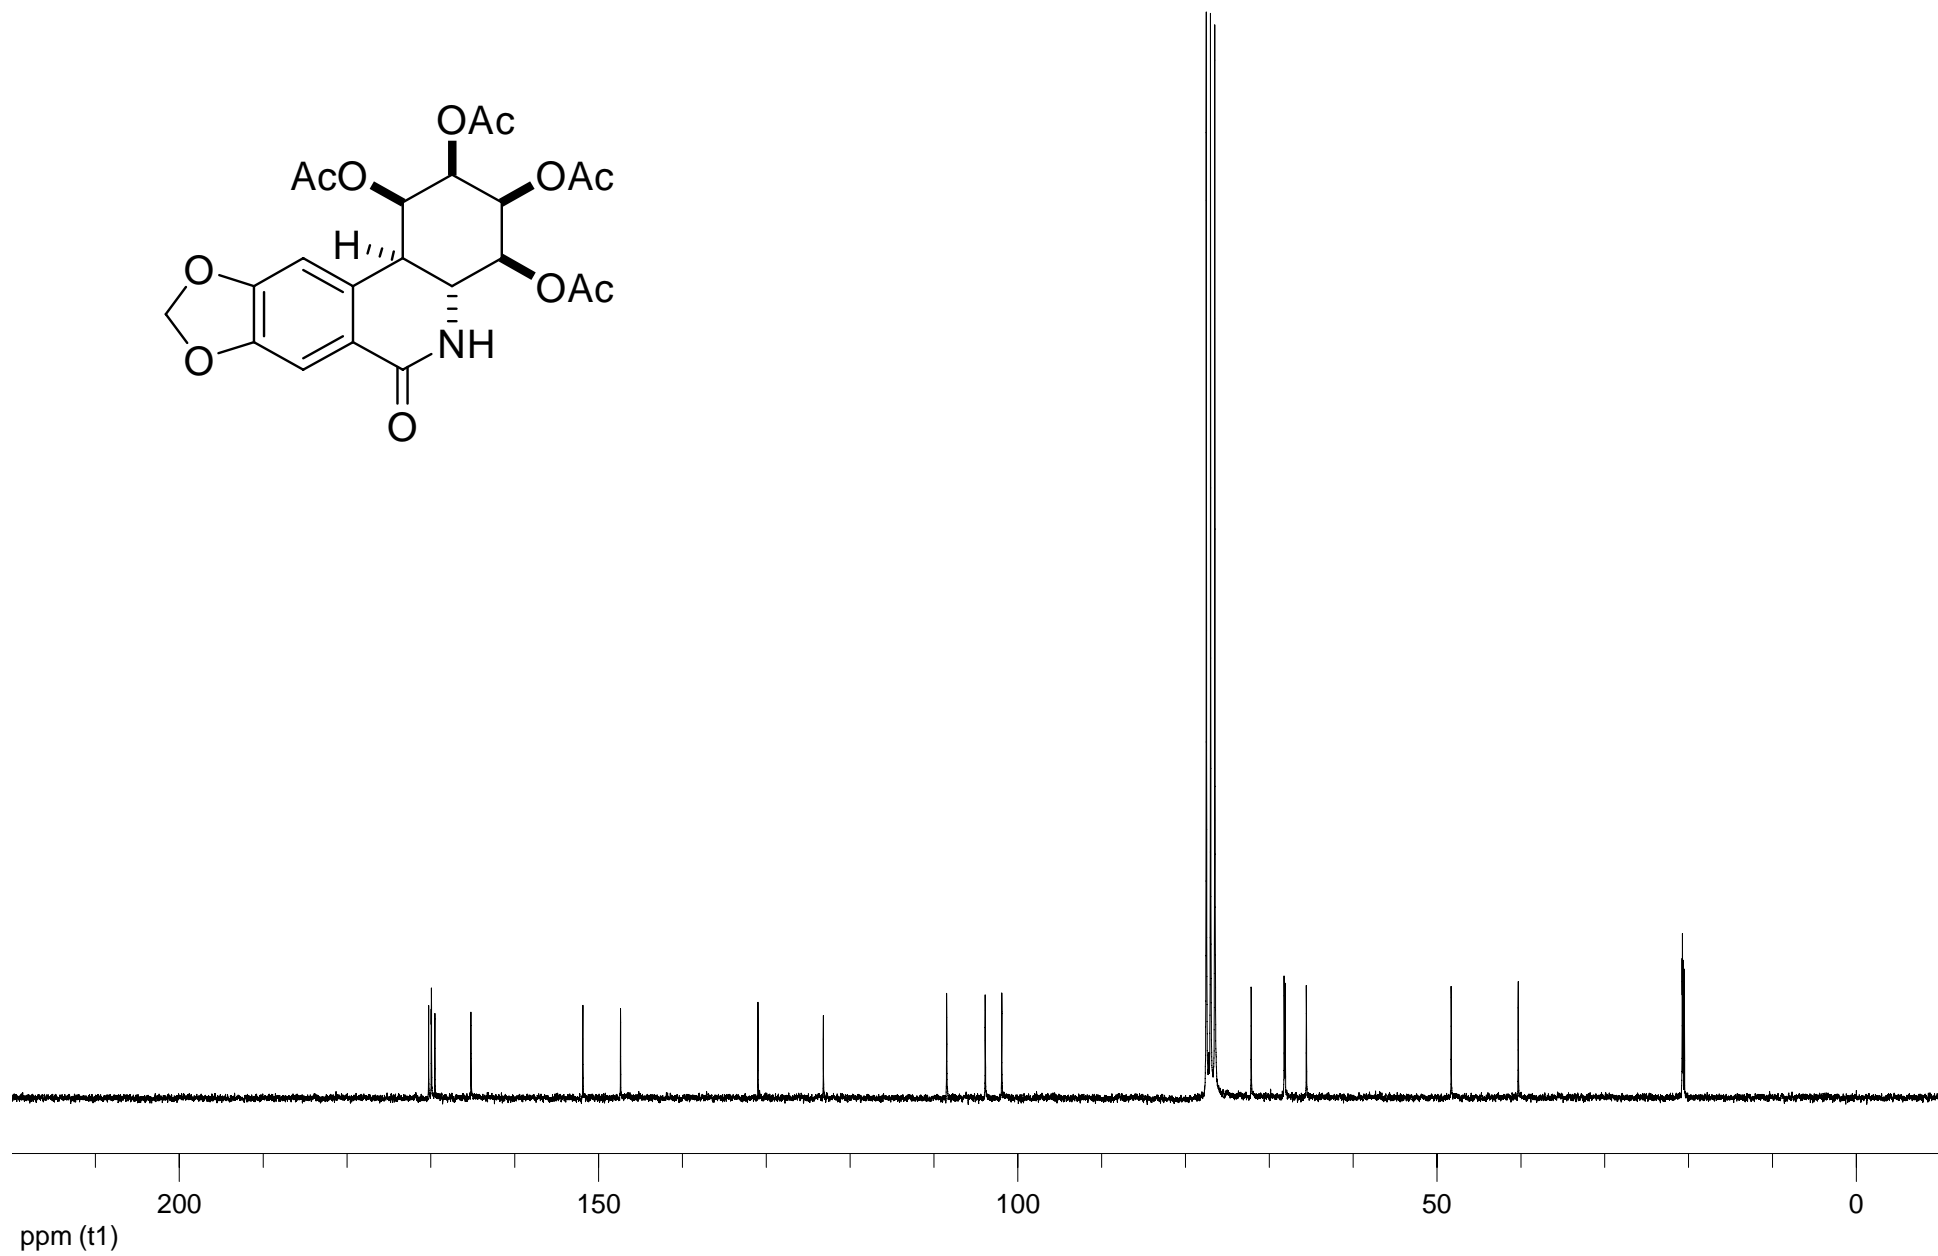

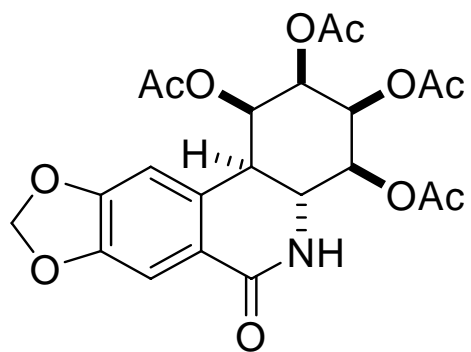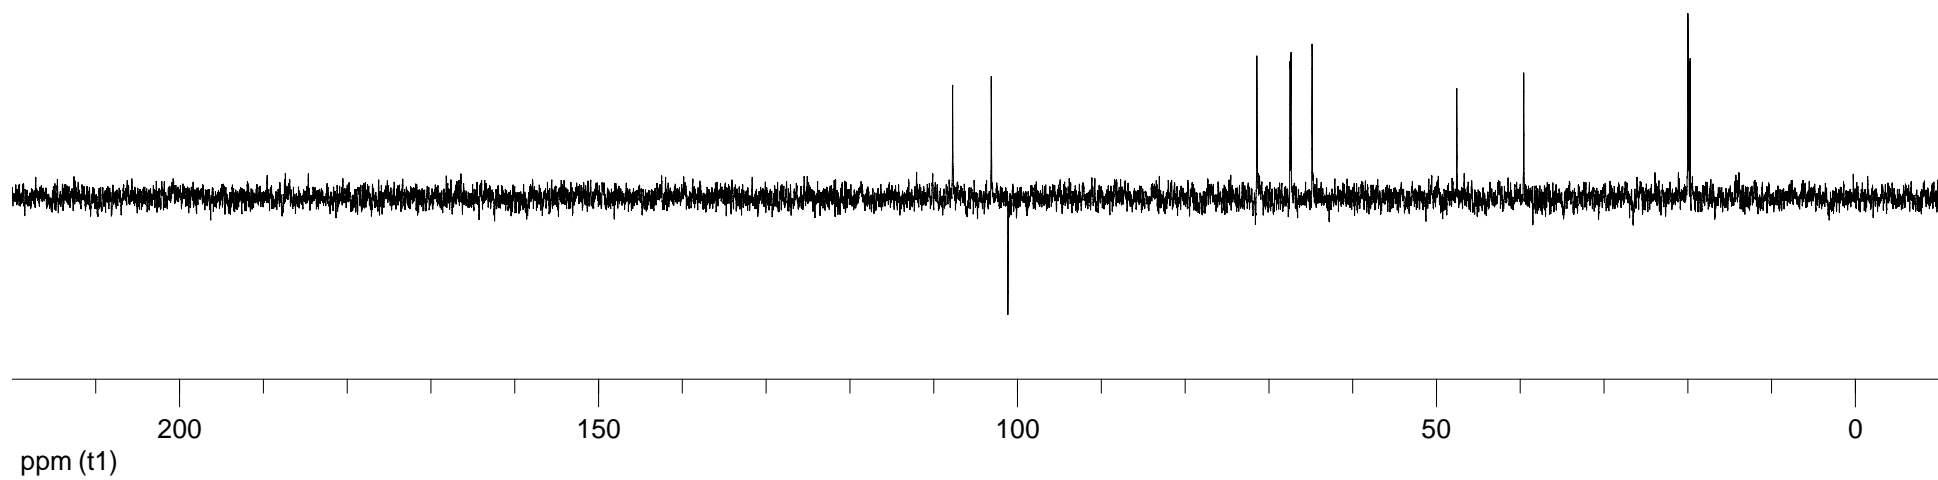

Supplement: b606277f.pdf [file b606277f.pdf]
